# Supplementary material
Source: PubMed Central journal article supplement (PMC4021001)
Supplement: NIHMS559704-supplement-01.pdf [file NIHMS559704-supplement-01.pdf]

## Appendix i: Google search for “Crohn’s disease diet”

| Hit # | Website                                                                                                                                                                                                               | Rec MD/<br>dietician<br>evaluation |
|-------|-----------------------------------------------------------------------------------------------------------------------------------------------------------------------------------------------------------------------|------------------------------------|
| 1     | <a href="http://www.webmd.com/ibd-crohns-disease/crohns-disease/creating-a-crohns-disease-diet-plan">http://www.webmd.com/ibd-crohns-disease/crohns-disease/creating-a-crohns-disease-diet-plan</a>                   | Y                                  |
| 2     | <a href="http://www.health.com/health/gallery/0,,20559874,00.html">http://www.health.com/health/gallery/0,,20559874,00.html</a>                                                                                       | N                                  |
| 3     | <a href="http://www.crohnsandme.com/living-with-crohns-disease/crohns-disease-diets.aspx">http://www.crohnsandme.com/living-with-crohns-disease/crohns-disease-diets.aspx</a>                                         | Y                                  |
| 4     | <a href="http://www.mayoclinic.com/health/crohns-disease/DS00104/DSECTION=lifestyle-and-home-remedies">http://www.mayoclinic.com/health/crohns-disease/DS00104/DSECTION=lifestyle-and-home-remedies</a>               | Y                                  |
| 5     | <a href="http://www.cdfa.org/what-are-crohns-and-colitis/what-is-crohns-disease/">http://www.cdfa.org/what-are-crohns-and-colitis/what-is-crohns-disease/</a>                                                         | Y                                  |
| 6     | <a href="http://www.medicinenet.com/crohns_disease/article.htm">http://www.medicinenet.com/crohns_disease/article.htm</a>                                                                                             | N                                  |
| 7     | <a href="http://www.everydayhealth.com/crohns-diet-pictures/joy-bauer-best-foods-for-crohns-disease.aspx">http://www.everydayhealth.com/crohns-diet-pictures/joy-bauer-best-foods-for-crohns-disease.aspx</a>         | Y                                  |
| 8     | <a href="http://en.wikipedia.org/wiki/Crohn%27s_disease">http://en.wikipedia.org/wiki/Crohn%27s_disease</a>                                                                                                           | N                                  |
| 9     | <a href="http://www.livingwithcrohnsdisease.com/livingwithcrohnsdisease/life_with_crohns/diet_nutrition.html">http://www.livingwithcrohnsdisease.com/livingwithcrohnsdisease/life_with_crohns/diet_nutrition.html</a> | Y                                  |
| 10    | <a href="http://www.emedicinehealth.com/diet_and_nutrition_in_crohn_disease/article_em.htm">http://www.emedicinehealth.com/diet_and_nutrition_in_crohn_disease/article_em.htm</a>                                     | Y                                  |
| 11    | <a href="http://digestive.niddk.nih.gov/ddiseases/pubs/crohns/#treatment">http://digestive.niddk.nih.gov/ddiseases/pubs/crohns/#treatment</a>                                                                         | Y                                  |
| 12    | <a href="http://www.nlm.nih.gov/medlineplus/crohnsdisease.html">http://www.nlm.nih.gov/medlineplus/crohnsdisease.html</a>                                                                                             | Y                                  |
| 13    | <a href="http://www.ncbi.nlm.nih.gov/pmc/articles/PMC2777086/">http://www.ncbi.nlm.nih.gov/pmc/articles/PMC2777086/</a>                                                                                               | Y                                  |
| 14    | <a href="http://www.huffingtonpost.com/2011/06/18/crohns-disease-diet_n_879593.html">http://www.huffingtonpost.com/2011/06/18/crohns-disease-diet_n_879593.html</a>                                                   | Y                                  |
| 15    | <a href="http://colitis.emedtv.com/crohn%27s-disease/crohn%27s-disease-diet.html">http://colitis.emedtv.com/crohn%27s-disease/crohn%27s-disease-diet.html</a>                                                         | Y                                  |
| 16    | <a href="http://health.nytimes.com/health/guides/disease/crohns-disease/treatment.html">http://health.nytimes.com/health/guides/disease/crohns-disease/treatment.html</a>                                             | Y                                  |
| 17    | <a href="http://www.webmd.com/ibd-crohns-disease/crohns-disease/default.htm">http://www.webmd.com/ibd-crohns-disease/crohns-disease/default.htm</a>                                                                   | Y                                  |
| 18    | <a href="http://www.umm.edu/altmed/articles/crohns-disease-000043.htm">http://www.umm.edu/altmed/articles/crohns-disease-000043.htm</a>                                                                               | Y                                  |
| 19    | <a href="http://www.rush.edu/rumc/page-1245962469737.html">http://www.rush.edu/rumc/page-1245962469737.html</a>                                                                                                       | Y                                  |
| 20    | <a href="http://www.amazon.com/Crohns-Disease-Diet-Cookbook-ebook/dp/B0058ORM1I">http://www.amazon.com/Crohns-Disease-Diet-Cookbook-ebook/dp/B0058ORM1I</a>                                                           | N                                  |
| 21    | <a href="http://mysite.verizon.net/vzetb4n6/crohnsdiseasesuccesswithdietandprobiotics/">http://mysite.verizon.net/vzetb4n6/crohnsdiseasesuccesswithdietandprobiotics/</a>                                             | Y                                  |
| 22    | <a href="http://uvahealth.com/services/digestive-health/images-and-docs/ibdcrohns.pdf">http://uvahealth.com/services/digestive-health/images-and-docs/ibdcrohns.pdf</a>                                               | Y                                  |

|    |                                                                                                                                                                             |   |
|----|-----------------------------------------------------------------------------------------------------------------------------------------------------------------------------|---|
| 23 | <a href="http://www.drweil.com/drw/u/ART00339/Crohns-Disease.html">http://www.drweil.com/drw/u/ART00339/Crohns-Disease.html</a>                                             | N |
| 24 | <a href="http://happy-tummy.org/journal/crohns-disease-diet-go-paleo/">http://happy-tummy.org/journal/crohns-disease-diet-go-paleo/</a>                                     | N |
| 25 | <a href="http://www.crohnsdiseasecauses.net/crohns-disease-diet-knowing-the-right-food/">http://www.crohnsdiseasecauses.net/crohns-disease-diet-knowing-the-right-food/</a> | N |
| 26 | <a href="http://www.3fatchicks.com/crohns-disease-diet-restrictions/">http://www.3fatchicks.com/crohns-disease-diet-restrictions/</a>                                       | Y |
| 27 | <a href="http://clinicaltrials.gov/show/NCT00343642">http://clinicaltrials.gov/show/NCT00343642</a>                                                                         | N |
| 28 | <a href="http://www.drmcDougall.com/med_colitis2.html">http://www.drmcDougall.com/med_colitis2.html</a>                                                                     | N |
| 29 | <a href="http://www.scdrecipe.com/">http://www.scdrecipe.com/</a>                                                                                                           | Y |
| 30 | <a href="http://spryliving.com/articles/crohns-disease-diet/">http://spryliving.com/articles/crohns-disease-diet/</a>                                                       | Y |

---

## Appendix ii: Bing search for “Crohn’s disease diet”

| Hit # | Website                                                                                                                                                                                                               | Rec MD/<br>dietician<br>evaluation |
|-------|-----------------------------------------------------------------------------------------------------------------------------------------------------------------------------------------------------------------------|------------------------------------|
| 1*    | <a href="http://www.webmd.com/ibd-crohns-disease/crohns-disease/creating-a-crohns-disease-diet-plan">http://www.webmd.com/ibd-crohns-disease/crohns-disease/creating-a-crohns-disease-diet-plan</a>                   | n/a                                |
| 2*    | <a href="http://colitis.emedtv.com/crohn's-disease/crohn's-disease-diet.html">http://colitis.emedtv.com/crohn's-disease/crohn's-disease-diet.html</a>                                                                 | n/a                                |
| 3     | <a href="http://www.crohns-disease-probiotics.com/crohns-disease-diet.html">http://www.crohns-disease-probiotics.com/crohns-disease-diet.html</a>                                                                     | Y                                  |
| 4     | <a href="http://www.livestrong.com/article/273697-diet-plan-for-crohns-disease/">http://www.livestrong.com/article/273697-diet-plan-for-crohns-disease/</a>                                                           | Y                                  |
| 5     | <a href="http://www.crohnsdiet.com/">http://www.crohnsdiet.com/</a>                                                                                                                                                   | Y                                  |
| 6     | <a href="http://www.webmd.com/ibd-crohns-disease/cd-biologics-10/cd-diet-and-nutrition">http://www.webmd.com/ibd-crohns-disease/cd-biologics-10/cd-diet-and-nutrition</a>                                             | Y                                  |
| 7*    | <a href="http://www.webmd.com/ibd-crohns-disease/crohns-disease/creating-a-crohns-disease-diet-plan">http://www.webmd.com/ibd-crohns-disease/crohns-disease/creating-a-crohns-disease-diet-plan</a>                   | n/a                                |
| 8     | <a href="http://www.crohsonline.com/living-with-crohns/crohns-diet.aspx">http://www.crohsonline.com/living-with-crohns/crohns-diet.aspx</a>                                                                           | Y                                  |
| 9     | <a href="http://www.livestrong.com/article/299510-diet-for-crohns-disease/">http://www.livestrong.com/article/299510-diet-for-crohns-disease/</a>                                                                     | N                                  |
| 10    | <a href="http://www.cdfa.org/resources/diet-and-nutrition-1.html">http://www.cdfa.org/resources/diet-and-nutrition-1.html</a>                                                                                         | Y                                  |
| 11*   | <a href="http://www.everydayhealth.com/crohns-diet-pictures/joy-bauer-best-foods-for-crohns-disease.aspx">http://www.everydayhealth.com/crohns-diet-pictures/joy-bauer-best-foods-for-crohns-disease.aspx</a>         | n/a                                |
| 12    | <a href="http://www.ehow.com/way_5297066_crohns-disease-diet.html">http://www.ehow.com/way_5297066_crohns-disease-diet.html</a>                                                                                       | Y                                  |
| 13    | <a href="http://www.drdahlman.com/crohns-disease-diet.shtml">http://www.drdahlman.com/crohns-disease-diet.shtml</a>                                                                                                   | N                                  |
| 14*   | <a href="http://www.crohnsandme.com/living-with-crohns-disease/crohns-disease-diets.aspx">http://www.crohnsandme.com/living-with-crohns-disease/crohns-disease-diets.aspx</a>                                         | n/a                                |
| 15    | <a href="http://www.ehow.com/way_5135958_foods-crohns-disease.html">http://www.ehow.com/way_5135958_foods-crohns-disease.html</a>                                                                                     | Y                                  |
| 16    | <a href="http://www.serovera.com/crohns-diet/">http://www.serovera.com/crohns-diet/</a>                                                                                                                               | Y                                  |
| 17    | <a href="http://www.everydayhealth.com/crohns-disease/crohns-disease-diet.aspx">http://www.everydayhealth.com/crohns-disease/crohns-disease-diet.aspx</a>                                                             | Y                                  |
| 18*   | <a href="http://www.livingwithcrohnsdisease.com/livingwithcrohnsdisease/life_with_crohns/diet_nutrition.html">http://www.livingwithcrohnsdisease.com/livingwithcrohnsdisease/life_with_crohns/diet_nutrition.html</a> | n/a                                |
| 19    | <a href="http://crohnsdiseasediet.com/">http://crohnsdiseasediet.com/</a>                                                                                                                                             | Y                                  |
| 20*   | <a href="http://digestive.niddk.nih.gov/ddiseases/pubs/crohns/">http://digestive.niddk.nih.gov/ddiseases/pubs/crohns/</a>                                                                                             | n/a                                |
| 21    | <a href="http://www.cdfa.org/resources/diet-and-nutrition-1.html">http://www.cdfa.org/resources/diet-and-nutrition-1.html</a>                                                                                         | Y                                  |
| 22*   | <a href="http://www.medicinenet.com/crohns_disease/article.htm">http://www.medicinenet.com/crohns_disease/article.htm</a>                                                                                             | n/a                                |
| 23*   | <a href="http://www.mayoclinic.com/health/crohns-disease/DS00104/DSECTION=lifestyle-and-">http://www.mayoclinic.com/health/crohns-disease/DS00104/DSECTION=lifestyle-and-</a>                                         | n/a                                |

home-remedies

|     |                                                                                                                                                                                   |     |
|-----|-----------------------------------------------------------------------------------------------------------------------------------------------------------------------------------|-----|
| 24  | <a href="http://www.diet.com/store/facts/crohns-disease">http://www.diet.com/store/facts/crohns-disease</a>                                                                       | Y   |
| 25* | <a href="http://www.emedicinehealth.com/diet_and_nutrition_in_crohn_disease/article_em.htm">http://www.emedicinehealth.com/diet_and_nutrition_in_crohn_disease/article_em.htm</a> | n/a |
| 26  | <a href="http://www.buzzle.com/articles/crohns-disease-diet.html">http://www.buzzle.com/articles/crohns-disease-diet.html</a>                                                     | N   |
| 27* | <a href="http://www.ccfa.org/resources/diet-and-nutrition-1.html">http://www.ccfa.org/resources/diet-and-nutrition-1.html</a>                                                     | n/a |
| 28* | <a href="http://www.buzzle.com/articles/crohns-diet.html">http://www.buzzle.com/articles/crohns-diet.html</a>                                                                     | n/a |
| 29* | <a href="http://www.diet.com/store/facts/crohns-disease">http://www.diet.com/store/facts/crohns-disease</a>                                                                       | n/a |
| 30  | <a href="http://www.dietsinreview.com/diets/crohns-disease-diet/">http://www.dietsinreview.com/diets/crohns-disease-diet/</a>                                                     | Y   |

---

\*Excluded due to repeat

## Appendix iii: Google search for “Ulcerative colitis diet”

| Hit # | Website                                                                                                                                                                                                         | Rec MD/dietician evaluation |
|-------|-----------------------------------------------------------------------------------------------------------------------------------------------------------------------------------------------------------------|-----------------------------|
| 1     | <a href="http://www.webmd.com/ibd-crohns-disease/ulcerative-colitis/creating-an-ulcerative-colitis-plan">http://www.webmd.com/ibd-crohns-disease/ulcerative-colitis/creating-an-ulcerative-colitis-plan</a>     | Y                           |
| 2     | <a href="http://www.mayoclinic.com/health/ulcerative-colitis/DS00598/DSECTION=lifestyle-and-home-remedies">http://www.mayoclinic.com/health/ulcerative-colitis/DS00598/DSECTION=lifestyle-and-home-remedies</a> | Y                           |
| 3     | <a href="http://www.health.com/health/gallery/0,,20500615,00.html">http://www.health.com/health/gallery/0,,20500615,00.html</a>                                                                                 | N                           |
| 4     | <a href="http://www.cdfa.org/living-with-crohns-colitis/">http://www.cdfa.org/living-with-crohns-colitis/</a>                                                                                                   | Y                           |
| 5     | <a href="http://ulcerativecolitisdiets.net/">http://ulcerativecolitisdiets.net/</a>                                                                                                                             | N                           |
| 6     | <a href="http://drbenkim.com/articles-ulcerative-colitis-diet.htm">http://drbenkim.com/articles-ulcerative-colitis-diet.htm</a>                                                                                 | N                           |
| 7     | <a href="http://www.everydayhealth.com/health-report/ulcerative-colitis/ulcerative-colitis-diet-tips.aspx">http://www.everydayhealth.com/health-report/ulcerative-colitis/ulcerative-colitis-diet-tips.aspx</a> | Y                           |
| 8     | <a href="http://www.medicinenet.com/ulcerative_colitis_diet/article.htm">http://www.medicinenet.com/ulcerative_colitis_diet/article.htm</a>                                                                     | Y                           |
| 9     | <a href="http://www.ncbi.nlm.nih.gov/pmc/articles/PMC1774255/">http://www.ncbi.nlm.nih.gov/pmc/articles/PMC1774255/</a>                                                                                         | N                           |
| 10    | <a href="http://www.colitiscookbook.com/">http://www.colitiscookbook.com/</a>                                                                                                                                   | N                           |
| 11    | <a href="http://www.thehealthyhomeeconomist.com/the-gaps-diet-heals-ulcerative-colitis/">http://www.thehealthyhomeeconomist.com/the-gaps-diet-heals-ulcerative-colitis/</a>                                     | N                           |
| 12    | <a href="http://www.ihaveuc.com/">http://www.ihaveuc.com/</a>                                                                                                                                                   | N                           |
| 13    | <a href="http://www.ihaveuc.com/the-diet/">http://www.ihaveuc.com/the-diet/</a>                                                                                                                                 | N                           |
| 14    | <a href="http://www.youtube.com/watch?v=e31bOsHfRpk">http://www.youtube.com/watch?v=e31bOsHfRpk</a>                                                                                                             | N                           |
| 15    | <a href="http://www.webmd.com/ibd-crohns-disease/ulcerative-colitis-diet-9/default.htm">http://www.webmd.com/ibd-crohns-disease/ulcerative-colitis-diet-9/default.htm</a>                                       | Y                           |
| 16    | <a href="http://colitis.emedtv.com/ulcerative-colitis/ulcerative-colitis-diet.html">http://colitis.emedtv.com/ulcerative-colitis/ulcerative-colitis-diet.html</a>                                               | Y                           |
| 17    | <a href="http://www.drmcDougall.com/stars/andrew_neuman.htm">http://www.drmcDougall.com/stars/andrew_neuman.htm</a>                                                                                             | N                           |
| 18    | <a href="http://www.livingwithuc.com/livingwithuc/life_with_uc/eat_smart.html">http://www.livingwithuc.com/livingwithuc/life_with_uc/eat_smart.html</a>                                                         | Y                           |
| 19    | <a href="http://www.nytimes.com/ref/health/healthguide/esn-ulcerativecolitis-expert.html">http://www.nytimes.com/ref/health/healthguide/esn-ulcerativecolitis-expert.html</a>                                   | N                           |
| 20    | <a href="http://voices.yahoo.com/the-perfect-diet-ulcerative-colitis-1423577.html">http://voices.yahoo.com/the-perfect-diet-ulcerative-colitis-1423577.html</a>                                                 | Y                           |
| 21    | <a href="http://altmedicine.about.com/od/digestivedisorders/a/Colitis_Remeddy_2.htm">http://altmedicine.about.com/od/digestivedisorders/a/Colitis_Remeddy_2.htm</a>                                             | N                           |
| 22    | <a href="http://www.emedicinehealth.com/ulcerative_colitis/page8_em.htm">http://www.emedicinehealth.com/ulcerative_colitis/page8_em.htm</a>                                                                     | Y                           |
| 23    | <a href="http://www.drweil.com/drw/u/ART03123/Ulcerative-Colitis-Inflammatory-Bowel-Disease.html">http://www.drweil.com/drw/u/ART03123/Ulcerative-Colitis-Inflammatory-Bowel-Disease.html</a>                   | N                           |

|    |                                                                                                                                                                                                     |   |
|----|-----------------------------------------------------------------------------------------------------------------------------------------------------------------------------------------------------|---|
| 24 | <a href="http://en.wikipedia.org/wiki/Ulcerative_colitis">http://en.wikipedia.org/wiki/Ulcerative_colitis</a>                                                                                       | N |
| 25 | <a href="http://www.facebook.com/pages/Ulcerative-Colitis-Diet/276829689066630">http://www.facebook.com/pages/Ulcerative-Colitis-Diet/276829689066630</a>                                           | N |
| 26 | <a href="http://www.jacksongi.com/diet/ulcerative-colitis">http://www.jacksongi.com/diet/ulcerative-colitis</a>                                                                                     | Y |
| 27 | <a href="http://www.webmd.com/ibd-crohns-disease/ulcerative-colitis-10/slideshow-diet-tips">http://www.webmd.com/ibd-crohns-disease/ulcerative-colitis-10/slideshow-diet-tips</a>                   | Y |
| 28 | <a href="http://health.usnews.com/health-conditions/digestive-disorders/ulcerative-colitis/managing">http://health.usnews.com/health-conditions/digestive-disorders/ulcerative-colitis/managing</a> | N |
| 29 | <a href="http://www.normalbreathing.com/crohns-ulcerative-colitis-diet.php#.UT80zDd4ySo">http://www.normalbreathing.com/crohns-ulcerative-colitis-diet.php#.UT80zDd4ySo</a>                         | N |
| 30 | <a href="http://www.rush.edu/rumc/page-1245962469737.html">http://www.rush.edu/rumc/page-1245962469737.html</a>                                                                                     | Y |

---

## Appendix iv: Bing search for "Ulcerative colitis diet"

| Hit # | Website                                                                                                                                                                                                         | Rec MD/<br>dietician<br>evaluation |
|-------|-----------------------------------------------------------------------------------------------------------------------------------------------------------------------------------------------------------------|------------------------------------|
| 1*    | <a href="http://www.webmd.com/ibd-crohns-disease/ulcerative-colitis/creating-an-ulcerative-colitis-plan">http://www.webmd.com/ibd-crohns-disease/ulcerative-colitis/creating-an-ulcerative-colitis-plan</a>     | n/a                                |
| 2*    | <a href="http://www.mayoclinic.com/health/ulcerative-colitis/ds00598/dsection=lifestyle-and-home-remedies">http://www.mayoclinic.com/health/ulcerative-colitis/ds00598/dsection=lifestyle-and-home-remedies</a> | n/a                                |
| 3*    | <a href="http://colitis.emedtv.com/ulcerative-colitis/ulcerative-colitis-diet.html">http://colitis.emedtv.com/ulcerative-colitis/ulcerative-colitis-diet.html</a>                                               | n/a                                |
| 4     | <a href="http://www.livestrong.com/article/203426-ulcerative-colitis-diet-foods/">http://www.livestrong.com/article/203426-ulcerative-colitis-diet-foods/</a>                                                   | N                                  |
| 5     | <a href="http://www.ehow.com/list_7358462_ulcerative-colitis-foods.html">http://www.ehow.com/list_7358462_ulcerative-colitis-foods.html</a>                                                                     | N                                  |
| 6     | <a href="http://www.serovera.com/colitis-diet/">http://www.serovera.com/colitis-diet/</a>                                                                                                                       | Y                                  |
| 7     | <a href="http://en.wikipedia.org/wiki/Ulcerative_colitis">http://en.wikipedia.org/wiki/Ulcerative_colitis</a>                                                                                                   | N                                  |
| 8     | <a href="http://colitispainfreefoods.com/">http://colitispainfreefoods.com/</a>                                                                                                                                 | N                                  |
| 9     | <a href="http://www.livestrong.com/article/29505-ulcerative-colitis-diet/">http://www.livestrong.com/article/29505-ulcerative-colitis-diet/</a>                                                                 | N                                  |
| 10    | <a href="http://www.cdfa.org/living-with-crohns-colitis/">http://www.cdfa.org/living-with-crohns-colitis/</a>                                                                                                   | N                                  |
| 11    | <a href="http://www.drdaelman.com/ulcerative-colitis-diet.shtml">http://www.drdaelman.com/ulcerative-colitis-diet.shtml</a>                                                                                     | N                                  |
| 12    | <a href="http://www.ulcerativecolitis.net/colitis-diet/">http://www.ulcerativecolitis.net/colitis-diet/</a>                                                                                                     | Y                                  |
| 13    | <a href="http://www.medicinenet.com/ulcerative_colitis/index.htm">http://www.medicinenet.com/ulcerative_colitis/index.htm</a>                                                                                   | Y                                  |
| 14    | <a href="http://www.mayoclinic.com/health/ulcerative-colitis/DS00598/METHOD=print&amp;DSECTION=all">http://www.mayoclinic.com/health/ulcerative-colitis/DS00598/METHOD=print&amp;DSECTION=all</a>               | Y                                  |
| 15    | <a href="http://www.medicinenet.com/ulcerative_colitis_diet/page3.htm">http://www.medicinenet.com/ulcerative_colitis_diet/page3.htm</a>                                                                         | Y                                  |
| 16    | <a href="http://colitisdiet.ihaveuc.com/">http://colitisdiet.ihaveuc.com/</a>                                                                                                                                   | N                                  |
| 17    | <a href="http://www.amazon.com/s?ie=UTF8&amp;page=1&amp;rh=n%3A283155%2Ck%3Aulcerative%20colitis%20diet">http://www.amazon.com/s?ie=UTF8&amp;page=1&amp;rh=n%3A283155%2Ck%3Aulcerative%20colitis%20diet</a>     | N                                  |
| 18    | <a href="http://www.everydayhealth.com/ulcerative-colitis/ulcerative-colitis-and-diet.aspx">http://www.everydayhealth.com/ulcerative-colitis/ulcerative-colitis-and-diet.aspx</a>                               | Y                                  |
| 19    | <a href="http://www.ulcerative-colitisdiet.com/">http://www.ulcerative-colitisdiet.com/</a>                                                                                                                     | N                                  |
| 20    | <a href="http://www.answers.com/topic/ulcerative-colitis">http://www.answers.com/topic/ulcerative-colitis</a>                                                                                                   | N                                  |
| 21    | <a href="http://www.dietulcerativecolitis.net/">http://www.dietulcerativecolitis.net/</a>                                                                                                                       | N                                  |
| 22    | <a href="http://www.ncbi.nlm.nih.gov/pubmedhealth/PMH0001296/">http://www.ncbi.nlm.nih.gov/pubmedhealth/PMH0001296/</a>                                                                                         | Y                                  |

|     |                                                                                                                                                                                               |     |
|-----|-----------------------------------------------------------------------------------------------------------------------------------------------------------------------------------------------|-----|
| 23  | <a href="http://www.cdfa.org/what-are-crohns-and-colitis/what-is-ulcerative-colitis/">http://www.cdfa.org/what-are-crohns-and-colitis/what-is-ulcerative-colitis/</a>                         | N   |
| 24* | <a href="http://www.health.com/health/gallery/0,,20500615,00.html">http://www.health.com/health/gallery/0,,20500615,00.html</a>                                                               | n/a |
| 25* | <a href="http://www.livingwithuc.com/livingwithuc/life_with_uc/eat_smart.html">http://www.livingwithuc.com/livingwithuc/life_with_uc/eat_smart.html</a>                                       | n/a |
| 26  | <a href="http://www.buzzle.com/articles/diet-for-ulcerative-colitis.html">http://www.buzzle.com/articles/diet-for-ulcerative-colitis.html</a>                                                 | N   |
| 27  | <a href="http://www.emedicinehealth.com/ulcerative_colitis/article_em.htm">http://www.emedicinehealth.com/ulcerative_colitis/article_em.htm</a>                                               | N   |
| 28  | <a href="http://www.umm.edu/patiented/articles/what_role_of_diet_ulcerative_colitis_000069_7.htm">http://www.umm.edu/patiented/articles/what_role_of_diet_ulcerative_colitis_000069_7.htm</a> | N   |
| 29  | <a href="http://www.nlm.nih.gov/medlineplus/ulcerativecolitis.html">http://www.nlm.nih.gov/medlineplus/ulcerativecolitis.html</a>                                                             | N   |
| 30  | <a href="http://www.amazon.com/s?ie=UTF8&amp;page=1&amp;rh=n%3A283155%2Ck%3Aulcerative%20colitis">http://www.amazon.com/s?ie=UTF8&amp;page=1&amp;rh=n%3A283155%2Ck%3Aulcerative%20colitis</a> | N   |

---

\*Excluded due to repeat
